# Supplementary material
Source: bioRxiv or medRxiv preprint supplement (https://www.biorxiv.org/content/biorxiv/early/2019/01/08/498105/DC1/embed/media-1.pdf)
Supplement: Supplementary file [file media-1.pdf]

# 1 Supplementary Materials

2

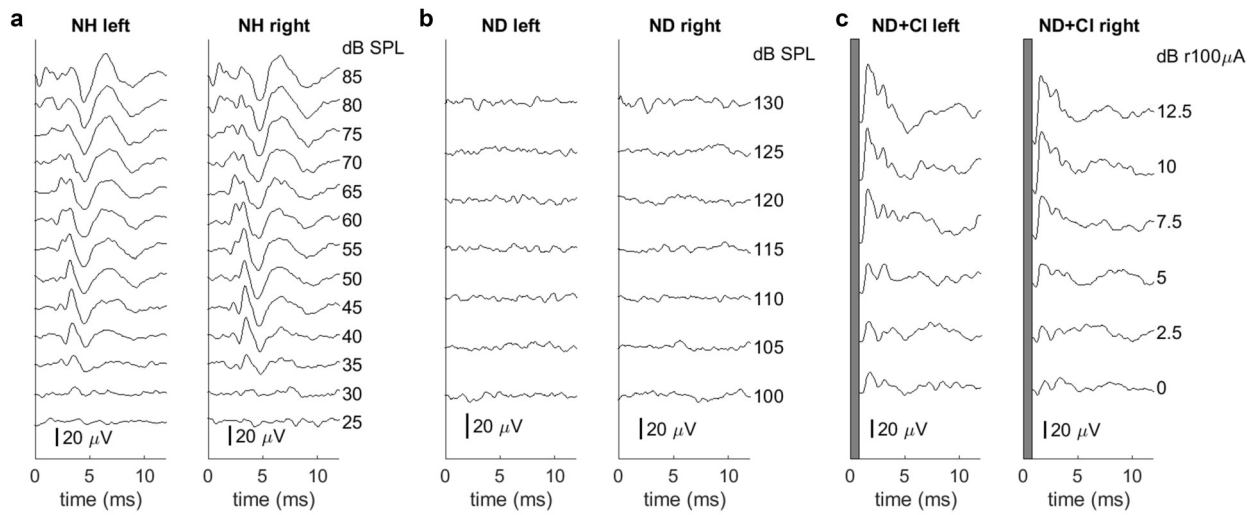

4 **Figure S1:** Brainstem recordings to verify normal hearing or loss of hearing function as  
5 well as the symmetrical placement of CIs. **a** Auditory brainstem responses of an  
6 acoustically stimulated normal hearing (NH) rat. ABRs are symmetrical for both ears and  
7 show clear differentiation. **b** ABRs of a neonatally deafened (ND) rat. No hearing  
8 thresholds were detectable up to 130 dB SPL. **c** Electrically evoked ABRs under CI  
9 stimulation of a deafened rat. Each subpanel includes measurements for the left and the  
10 right ear, respectively, under acoustic (**a-b**) or electric stimulation (**c**).

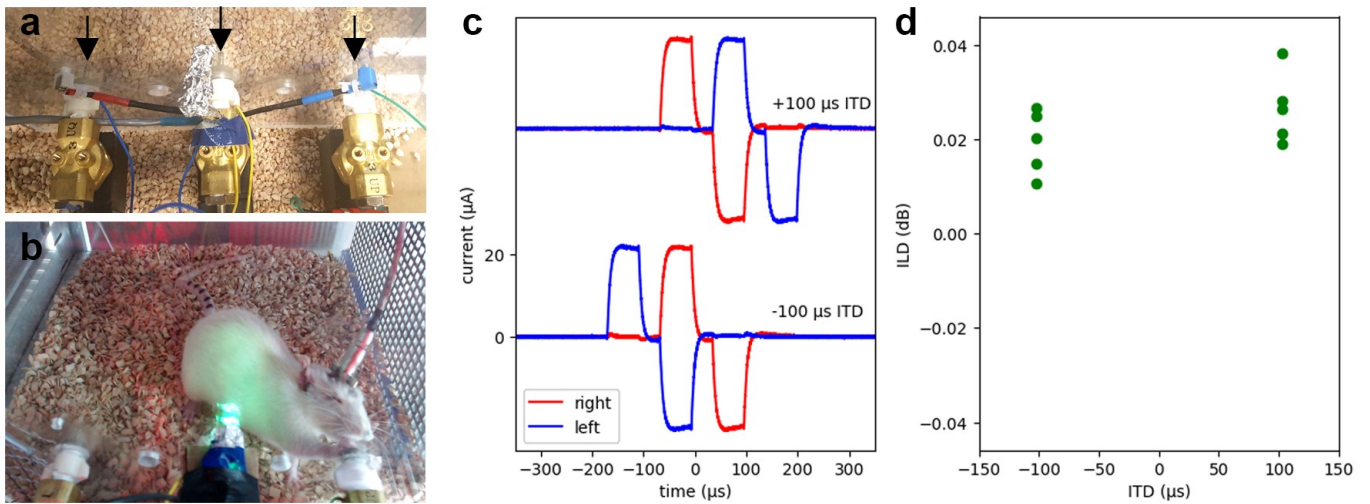

11 **Figure S2:** Binaural electrical intracochlear stimulation of CI rats. **a** Close-up of the training  
 12 setup for CI rats. The central “start” and lateral “response” spouts deliver the water reward  
 13 and are indicated by arrows. **b** CI rat during a testing session, making a response to the  
 14 left by making contact with the left reward spout. **c** Calibration measurements were  
 15 performed by connecting the stimulator cable to 10 kOhm resistors instead of the in-vivo  
 16 electrodes and recording voltages using a Tektronix MSO 4034B oscilloscope with 350  
 17 MHz and 2.5 GS/s. Recordings of stimulus pulses are shown with 100 μs ITD leading in  
 18 the right ear (top) or the left ear (bottom) respectively. Pulses delivered to the right ear  
 19 are shown in red, those delivered in the left ear in blue. The stimulator was programmed to  
 20 produce biphasic rectangular stimulus pulses with a 20 μA amplitude (y-axis) and a 23 μs  
 21 inter-pulse interval. **d** Measured calibration pulses such as those shown in (c) were used  
 22 to verify that electric ILDs were negligible and did not vary systematically with ITD. ILDs  
 23 were computed as the difference in root mean square (RMS) power of the signals in (d).  
 24 Data from five presentations of ITDs of + or – 100 μs are shown by the green dots. These  
 25 residual ILDs produced by device tolerances in our system are not only an order of  
 26 magnitude smaller than the ILD thresholds for human CI subjects reported in the literature  
 27 (~0.1 dB [73]), they also do not covary with ITD. We can therefore be certain that  
 28 sensitivity to ILDs can not account for our behavior data.

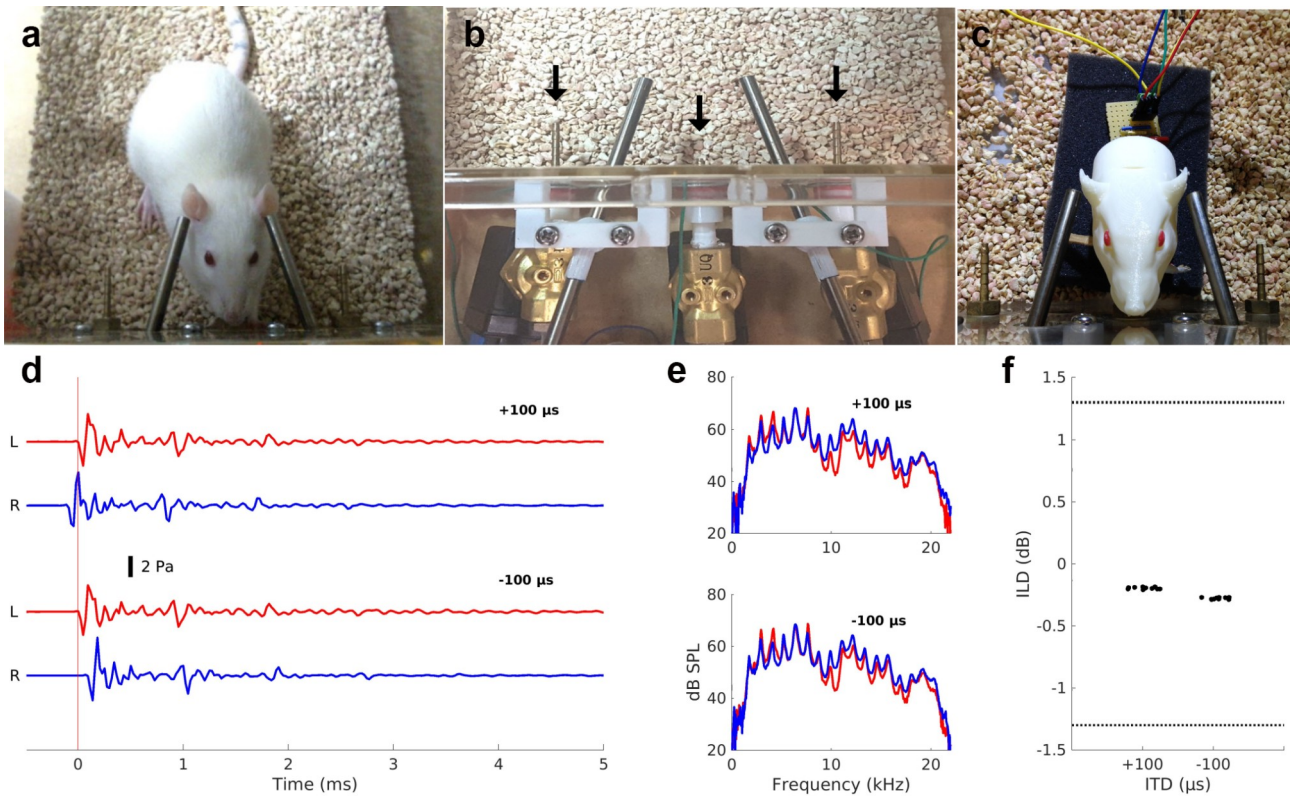

30 **Figure S3:** Binaural psychoacoustics near-field setup for NH rats. **a** NH rat during a testing  
 31 session, initiating a trial by making contact with the central “start” spout. Steel tube phones  
 32 are positioned close to each ear. **b** Close-up of the assembly. The central “start” and  
 33 lateral “response” spouts deliver the water reward and are indicated by arrows. Also visible  
 34 are the custom ball joints for adjusting the tube phone positions. **c** 3D printed “rat kemar  
 35 head” with miniature microphones in each ear canal, used for validating the setup. **d**  
 36 Validation data for acoustic click stimuli as recorded from the microphones inside each ear  
 37 canal of the 3D printed “rat kemar head” (L: left ear, R: right ear) in response to the +/- 100  
 38 μs ITD conditions (top and bottom pair of traces, respectively). **e** Frequency spectra of the  
 39 sound waveforms recorded by the microphones in each ear for the +100 μs (top) and -100  
 40 μs (bottom) conditions. **f** Acoustic ILDs (y-axes) measured through the kemar microphones  
 41 for the +/- 100 μs ITD conditions. ILDs were computed as the difference in root mean  
 42 square (RMS) power of the signals in panel (d). Data were recorded from 10 presentations  
 43 of each ITD stimulus, and each dot represents one trial (a random amount of scatter along  
 44 the x-axis was added for ease of visualization). Note that the residual ILDs are much  
 45 smaller than the reported behavioral thresholds for ferrets (~ 1.3 dB, dotted line, [32]) or  
 46 rats (~3 dB [34]). We can therefore be certain that sensitivity to ILDs can not account for  
 47 our behavior data.
